# Supplementary material
Source: ML conference proceedings conference paper supplement (https://aclanthology.org/D19-1194)
Supplement: Attachment [file D19-1194.Attachment.pdf]

## A Qualitative Analysis

Because the models generate different responses with different knowledge given the same input message, it is difficult to design a universal changed knowledge graph for fair comparison of all models. We provide the qualitative analysis for further investigation. Some examples of our proposed Qadpt model with changed knowledge graphs are shown in Table 8. This demonstrates that Qadpt can successfully modify the response with a minor-changed knowledge graph. More examples of response generation are given in Table 9.

|                  |                                                                                                                                                                        |
|------------------|------------------------------------------------------------------------------------------------------------------------------------------------------------------------|
| Message Input    | 甄嬛 (甘露寺, 夜。正睡覺, 有野貓闖入): 怎麼了? ——有貓!<br>(Zhen Huan: What's wrong? - A cat!)                                                                                              |
| Reference Output | 浣碧 (一陣慌亂): 槿汐, 快點去打貓, 小姐被貓傷過, 見不得貓的!<br>Wan-Bi: <b>Jin-Xi</b> , go and catch the cat. Mistress was hurt by a cat, and became afraid of it.                             |
| Original KG Path | 甄嬛(Zhen Huan) → 主僕(IsServantOrMasterOf) → 槿汐(Jin-Xi)                                                                                                                   |
| Original Output  | 槿汐, 是什麼事啊? ( <b>Jin-Xi</b> , what happend?)                                                                                                                            |
| Changed KG Path  | 甄嬛(Zhen Huan) → 主僕(IsServantOrMasterOf) → 小允子(Yun)                                                                                                                     |
| Changed Output   | 小允子, 小允子! (Yun, Yun!)                                                                                                                                                  |
| Message Input    | [Scene : The restaurant . <b>Chandler</b> and <b>Monica</b> are sitting at a table]<br>Monica: Oh my God, he's gonna do it now. Please, I cannot watch this, let's go. |
| Reference Output | Chandler: I think we have some time. Have you ever heard him talk?<br>Uh, <b>Phoebe</b> , uh, I would be honoured, uh... Spit it out, <b>David</b> !                   |
| Original KG Path | Phoebe → lover → David                                                                                                                                                 |
| Original Output  | <b>David</b> is , <b>David</b> , is it ?                                                                                                                               |
| Changed KG Path  | Phoebe → lover → <b>Mike</b>                                                                                                                                           |
| Changed Output   | <b>Mike</b> ?                                                                                                                                                          |

Table 8: Some examples of the response generation with a changed knowledge graph.

|           |                                                                                                                                                                                                                                                                                              |
|-----------|----------------------------------------------------------------------------------------------------------------------------------------------------------------------------------------------------------------------------------------------------------------------------------------------|
| Input     | 皇帝（眉莊氣急站立不穩，甄嬪忙扶住）：無妨！都一樣是太醫。                                                                                                                                                                                                                                                                |
| Reference | (Emperor: It's okay! They are all <b>imperial doctors</b> .)<br>皇后（章彌把脈良久）：章太醫，究竟什麼個情形？莫非驚動了胎氣？<br>(Empress: <b>Imperial doctor</b> Zhang, what's the situation? is it a miscarriage?)                                                                                                       |
| Seq2Seq   | 皇上？(Emperor?)                                                                                                                                                                                                                                                                                |
| MemNet    | 浣碧，你看看，你看看，你是個太醫，你也不知道了。<br>(Wan-Bi, you see, you see, you are an <b>imperial doctor</b> , and you don't know either.)                                                                                                                                                                       |
| TAware    | 謝皇后娘娘。(Thanks to <b>Empress Madame</b> .)                                                                                                                                                                                                                                                    |
| KAware    | 妃浣碧，我都是了，我是我的，我是我的身子，我也是不是。<br>( <b>Consort Wan-Bi</b> , I am, I'm mine, I'm my body, I am, right?)                                                                                                                                                                                          |
| Qadpt     | 太醫，這是什麼？(Imperial Doctor, what is that?)                                                                                                                                                                                                                                                     |
| Input     | 年妃（江福海乘船到湖邊）：你說口諭便是口諭了？等本宮見了皇上再說。                                                                                                                                                                                                                                                            |
| Reference | Consort Nian: Whatever you said. Let me see the <b>emperor</b> .<br>江福海：娘娘，奴才怎敢假傳皇上口諭呢？皇上不想見您也不是一日兩日了，<br>(Jiang, Fuhai: <b>Madame</b> , I do not full you. Dare I say, the <b>emperor</b> do not want to see you.)                                                                          |
| Seq2Seq   | 娘娘，您是不是？(Madame, you are?)                                                                                                                                                                                                                                                                   |
| MemNet    | 是，娘娘說來了。(Yes, <b>madame</b> said she is coming.)                                                                                                                                                                                                                                             |
| TAware    | 謝皇上。(Thanks to the <b>emperor</b> .)                                                                                                                                                                                                                                                         |
| KAware    | 奴婢給娘娘請安。(I pay respects to <b>madame</b> .)                                                                                                                                                                                                                                                  |
| Qadpt     | 是，娘娘，您的心思是——(Sure, <b>madame</b> , you are thinking about —)                                                                                                                                                                                                                                 |
| Input     | 華妃（園中）：免了，本宮可不敢當莞嬪此禮。你越是恭順，本宮就越是覺得可憎。                                                                                                                                                                                                                                                        |
| Reference | (Consort Hua: It's okay, I don't want you pay respects to me. The more respectful you are, the more horror I feel.)<br>甄嬪：娘娘真是說笑了，難道娘娘是喜歡妹妹對娘娘不恭不順直言犯上嗎？妹妹並不敢肆意冒犯娘娘。<br>(Zhen Huan: <b>Madame</b> is kidding. Does <b>madame</b> want me to say the truth? I'm not dare to offend you.)      |
| Seq2Seq   | 臣妾不敢。(I dare not do it.)                                                                                                                                                                                                                                                                     |
| MemNet    | 娘娘，臣妾不敢。(Madame, I dare not do it.)                                                                                                                                                                                                                                                          |
| TAware    | 娘娘還是這樣，娘娘也不是不是娘娘的。(Madame is still the same. <b>Madame</b> is not <b>madame</b> 's)                                                                                                                                                                                                          |
| KAware    | 謝妃朕。(Thanks to <b>Consort I</b> .)                                                                                                                                                                                                                                                           |
| Qadpt     | 娘娘，娘娘別多心了。(Madame, Madame, don't think too much.)                                                                                                                                                                                                                                            |
| Input     | [Scene : The Rehearsal Dinner, <b>Chandler</b> and <b>Monica</b> are greeting guests as they arrive. A woman enters.] Mr. geller: So are you his mother or his father?                                                                                                                       |
| Reference | Mrs. geller: <b>Jack</b> !                                                                                                                                                                                                                                                                   |
| Seq2Seq   | <b>Ross</b> , I'm so sorry.                                                                                                                                                                                                                                                                  |
| MemNet    | Are you guys doing <b>Chandler</b> ?                                                                                                                                                                                                                                                         |
| TAware    | Well, I'm sorry, I'm sorry, I'm sorry, I'm sorry, <b>Chandler</b> .                                                                                                                                                                                                                          |
| KAware    | <b>Ross</b> .                                                                                                                                                                                                                                                                                |
| Qadpt     | <b>Jack</b> 's gonna be here!                                                                                                                                                                                                                                                                |
| Input     | [Scene: The Rehearsal Dinner, <b>Chandler</b> and <b>Monica</b> are greeting guests as they arrive. A woman enters.] Ross: Can I have everyone's attention please? I'm uh; I'm <b>Ross Geller</b> .                                                                                          |
| Reference | Mr. geller: <b>Doctor Ross Geller</b> .                                                                                                                                                                                                                                                      |
| Seq2Seq   | Hey, <b>Joey</b> , you're gonna have a baby.                                                                                                                                                                                                                                                 |
| MemNet    | Well, I'm sorry, I'm not going to be with <b>Emma</b> .                                                                                                                                                                                                                                      |
| TAware    | Oh, <b>Rachel</b> .                                                                                                                                                                                                                                                                          |
| KAware    | Hey, <b>Ross</b> , you're a great guy.                                                                                                                                                                                                                                                       |
| Qadpt     | Hey, <b>Ross Geller</b> , I'm gonna go.                                                                                                                                                                                                                                                      |
| Input     | [Scene: <b>Monica</b> and <b>Rachel</b> 's, <b>Chandler</b> and <b>Monica</b> and <b>Rachel</b> and <b>Phoebe</b> are planning their respective strategies to break the other pairing. <b>Joey</b> is not amused.] Joey: Hey, check it out! Check it out! Ugly Naked Guy has a naked friend! |
| Reference | Rachel: Oh yeah! Oh my God! That is our friend! It's Naked <b>Ross</b> !                                                                                                                                                                                                                     |
| Seq2Seq   | Hey, <b>Monica</b> , I'm sorry.                                                                                                                                                                                                                                                              |
| MemNet    | Hey <b>Ross</b> !                                                                                                                                                                                                                                                                            |
| TAware    | <b>Ross</b> !                                                                                                                                                                                                                                                                                |
| KAware    | Oh, <b>Ross</b> , you're so sorry.                                                                                                                                                                                                                                                           |
| Qadpt     | <b>Ross</b> , you have to go to the bathroom!                                                                                                                                                                                                                                                |

Table 9: Some examples of the response generation.
